# Supplementary material
Source: publisher figshare collection journal article supplement (https://asha.figshare.com/articles/dataset/_/19125911)
Supplement: Supplementary file 1 [file 1]

**Supplemental Material S6.** Estimated covariances of the working memory factors from the model.

|                                                                 | Central<br>Executive    | Focus of<br>Attention/<br>Visuospatial<br>Sketch Pad | Phonological<br>Storage &<br>Rehearsal/<br>Phonological<br>Loop | EVT <sup>a</sup>          | KABC <sup>b</sup> |
|-----------------------------------------------------------------|-------------------------|------------------------------------------------------|-----------------------------------------------------------------|---------------------------|-------------------|
| Central<br>Executive                                            | .03 (.01)               | 0.71                                                 | 0.17                                                            | 0.22                      | 0.4               |
| Focus of<br>Attention/<br>Visuospatial<br>Sketch Pad            | .05 (.01)<br>$p < .001$ | .17 (.05)                                            | 0.28                                                            | 0.18                      | 0.62              |
| Phonological<br>Storage &<br>Rehearsal/<br>Phonological<br>Loop | .13 (.10)<br>$p = .183$ | .49 (.28)<br>$p = .074$                              | 19.90 (8.79)                                                    | 0.39                      | 0.16              |
| EVT <sup>a</sup>                                                | .40 (.15)<br>$p = .008$ | .77 (.50)<br>$p = .127$                              | 18.33 (.622)<br>$p = .003$                                      | 109.68<br>(10.83)         | 0.31              |
| KABC <sup>b</sup>                                               | .10 (.02)<br>$p < .001$ | .38 (.07)<br>$p < .001$                              | 1.08 (.59)<br>$p = .069$                                        | 4.97 (1.32)<br>$p < .001$ | 2.28 (0.26)       |

*Note.* In the matrix, diagonal elements are variances; elements below the diagonal are covariances, and elements above the diagonal are standardized covariances (correlations). Standard errors are given in parentheses, and  $p$  values are given for the tests of the covariances. <sup>a</sup>EVT = Latent factor for the EVT-2 variable. <sup>b</sup>KABC = Latent factor for the KABC-2 variable.
