# Supplementary material
Source: publisher figshare collection journal article supplement (https://asha.figshare.com/articles/dataset/_/19125911)
Supplement: Supplementary file 1 [file 1]

## Sheet: Summary Statistics Table
Supplemental material, Gray et al., “Working Memory Predicts New Word Learning Over and Above Existing Vocabulary and Nonverbal IQ,” JSLHR, https://doi.org/10.1044/2021_JSLHR-21-00397
Supplemental Material S1. Correlations among working memory, word learning measures, expressive vocabulary, & nonverbal IQ (lower-left triangle), N for each measure (Diagonal), and N for each pair of measures (upper-right triangle).
	N-back Auditory	N-back Visual	Number Updating	Digit Span	Digit Span Running	Nonword Repitition	Location Span	Location Span Running	Visual Span	Visual Span Running	Phonological Binding	Visual-Spatial Binding	Cross-Modal Binding	Mispronunciation Detections Nouns 2 Syllables	Mispronunciation Detections Nouns 4 Syllables	Naming Nouns 2 Syllables	Naming Nouns 4 Syllables	Mispronunciation Detection Nouns Similar	Mispronunciation Detection Nouns Dissimilar	Naming Nouns Similar	Naming Nouns Dissimilar	Mispronunciation Detection Verbs	Naming Verbs	Visual Difference Decision Nouns Stationary	Visual Difference Decision Nouns Move	Visual Feature Recall Nouns Stationary	Visual Feature Recall Nouns Move	Visual Difference Decision Verbs	Visual Feature Recall Verbs	Visual Difference Decision Nouns Visually Similar	Visual Difference Decision Nouns Visually Dissimilar	Phonological-Visual Linking Nouns 2 Syllable	Phonological-Visual Linking Nouns 4 Syllable	Phonological-Visual Linking Nouns Similar	Phonological-Visual Linking Nouns Dissimilar	Phonological-Visual Linking Verbs Stationary	Phonological-Visual Linking Verbs Move	Phonological-Visual Linking Nouns Visually Similar	Phonological-Visual Linking Nouns Visually Dissimilar	Phonological-Visual Linking Verbs	Visual Feature Recall Nouns Visually Similar	Visual Feature Recall Nouns Visually Dissimilar	EVT-2	KABC-2	KABC_scaled
N-back Auditory	158	157	156	157	156	151	156	156	157	128	147	157	154	152	152	148	148	155	155	151	150	148	144	153	153	153	153	148	148	152	152	152	152	155	155	153	153	155	155	148	155	155	158	158	158
N-back Visual	0.41**	162	160	161	160	155	160	160	160	132	151	160	158	156	156	152	152	159	159	155	154	153	148	157	157	157	157	153	153	156	156	156	156	159	159	157	157	159	159	153	159	159	162	162	162
Number Updating	0.19*	0.35**	163	163	161	157	162	162	159	133	153	159	159	157	157	153	153	160	160	156	155	154	149	159	159	159	159	154	154	157	157	157	157	160	160	159	159	160	160	154	160	160	163	163	163
Digit Span	0.06	0.06	-0.04	164	162	158	163	163	160	134	154	160	160	158	158	154	154	161	161	157	156	155	150	160	160	160	160	155	155	158	158	158	158	161	161	160	160	161	161	155	161	161	164	164	164
Digit Span Running	0.05	0.17*	0.08	0.22**	163	157	162	161	159	134	153	159	161	158	158	154	154	160	160	156	155	153	148	159	159	159	159	153	153	158	158	158	158	160	160	159	159	161	161	153	161	161	163	163	163
Nonword Repitition	0.08	0.14	0.06	0.26**	0.18*	158	158	157	154	130	152	154	156	154	154	150	150	156	156	153	152	149	144	155	155	155	155	149	149	154	154	154	154	156	156	155	155	156	156	149	156	156	158	158	158
Location Span	0.14	0.32**	0.17*	0.11	0.22**	0.03	164	162	159	134	155	159	161	159	159	155	155	161	161	157	156	154	149	160	160	160	160	154	154	159	159	159	159	161	161	160	160	161	161	154	161	161	164	164	164
Location Span Running	0.06	0.41**	0.32**	0.06	0.28**	0.07	0.43**	163	159	133	153	159	159	157	157	153	153	160	160	156	155	154	149	159	159	159	159	154	154	157	157	157	157	160	160	159	159	160	160	154	160	160	163	163	163
Visual Span	0.24**	0.45**	0.24**	0.05	0.17*	0.19*	0.37**	0.33**	161	131	150	159	157	155	155	151	151	158	158	154	153	151	147	156	156	156	156	151	151	155	155	155	155	158	158	156	156	158	158	151	158	158	161	161	161
Visual Span Running	0.14	0.40**	0.19*	0.09	0.32**	0.21*	0.25**	0.40**	0.31**	134	128	131	132	131	131	128	128	132	132	130	129	126	121	133	133	133	133	126	126	131	131	131	131	132	132	133	133	132	132	126	132	132	134	134	134
Phonological Binding	0.09	0.05	0.13	0.22**	0.11	0.33**	0.1	0.18*	0.13	0.22*	155	150	153	151	151	148	148	152	152	149	148	146	141	151	151	151	151	146	146	151	151	151	151	152	152	151	151	152	152	146	152	152	155	155	155
Visual-Spatial Binding	0.17*	0.32**	0.17*	-0.04	0.22**	0.07	0.33**	0.36**	0.41**	0.45**	0.07	161	157	155	155	151	151	158	158	154	153	151	146	156	156	156	156	151	151	155	155	155	155	158	158	156	156	158	158	151	158	158	161	161	161
Cross-Modal Binding	0.22**	0.35**	0.18*	0.09	0.12	0.13	0.27**	0.22**	0.32**	0.39**	0.16	0.35**	162	158	158	154	154	158	158	155	154	151	146	157	157	157	157	151	151	158	158	158	158	158	158	157	157	159	159	151	159	159	162	162	162
Mispronunciation Detections Nouns 2 Syllables	0.21**	0.30**	0.26**	0.07	0.11	0.18*	0.06	0.20*	0.14	0.21*	0.13	0.14	0.21**	159	159	155	155	156	156	153	152	149	144	155	155	155	155	149	149	159	159	159	159	156	156	155	155	156	156	149	156	156	159	159	159
Mispronunciation Detections Nouns 4 Syllables	0.18*	0.15	0.16*	0.12	0.1	0.19*	-0.03	0.03	0.07	-0.03	0.15	-0.07	0.06	0.39**	159	155	155	156	156	153	152	149	144	155	155	155	155	149	149	159	159	159	159	156	156	155	155	156	156	149	156	156	159	159	159
Naming Nouns 2 Syllables	0.14	0.29**	0.14	0.16*	0.29**	0.09	0.11	0.21*	0.30**	0.20*	0.04	0.05	0.21**	0.22**	0.22**	155	155	152	152	149	148	145	140	151	151	151	151	145	145	155	155	155	155	152	152	151	151	152	152	145	152	152	155	155	155
Naming Nouns 4 Syllables	0.03	0.17*	0.05	0.21**	0.12	0.20*	0	0.07	0.15	0.06	0.02	0.09	0.05	0.03	0.11	0.39**	155	152	152	149	148	145	140	151	151	151	151	145	145	155	155	155	155	152	152	151	151	152	152	145	152	152	155	155	155
Mispronunciation Detection Nouns Similar	0.05	0.12	0.01	0.02	0.17*	0.20*	0.13	0.06	0.07	0.15	0.13	0.04	0.02	0.12	0.06	0.1	0.17*	162	162	158	157	152	147	158	158	158	158	152	152	156	156	156	156	162	162	158	158	159	159	152	159	159	162	162	162
Mispronunciation Detection Nouns Dissimilar	0	0.22**	0.13	0.18*	0.11	0.18*	0.11	0.21**	0.1	-0.05	0.08	-0.03	0.02	0.15	0.20*	0.32**	0.30**	0.26**	162	158	157	152	147	158	158	158	158	152	152	156	156	156	156	162	162	158	158	159	159	152	159	159	162	162	162
Naming Nouns Similar	0.04	0.26**	0.1	0.06	0.19*	0.31**	0.01	0.16*	0.22**	0.16	0.01	0.13	0.11	0.26**	0.18*	0.48**	0.33**	0.21**	0.34**	158	157	148	143	154	154	154	154	148	148	153	153	153	153	158	158	154	154	155	155	148	155	155	158	158	158
Naming Nouns Dissimilar	0.05	0.24**	0.11	0.06	0.19*	0.19*	0.1	0.15	0.19*	0.32**	-0.04	0.11	0.13	0.22**	0.21**	0.43**	0.29**	0.19*	0.26**	0.62**	157	147	142	153	153	153	153	147	147	152	152	152	152	157	157	153	153	154	154	147	154	154	157	157	157
Mispronunciation Detection Verbs	0.17*	0.28**	0.23**	0.04	0.03	0.18*	0.1	0.18*	0.1	0.09	0.11	0.07	0.13	0.29**	0.06	0.19*	0.22**	0.26**	0.29**	0.26**	0.18*	155	150	151	151	151	151	155	155	149	149	149	149	152	152	151	151	152	152	155	152	152	155	155	155
Naming Verbs	0.11	0.21**	0.07	0.08	0.19*	0.23**	0.09	0.28**	0.24**	0.18	0.15	0.09	0.16	0.28**	0.07	0.32**	0.25**	0.17*	0.17*	0.41**	0.31**	0.36**	150	146	146	146	146	150	150	144	144	144	144	147	147	146	146	147	147	150	147	147	150	150	150
Visual Difference Decision Nouns Stationary	0.08	0.19*	0.21**	0.09	0.03	0.13	0.03	0.06	0.08	0.11	0.04	0.04	0.09	0.13	0.01	0.26**	0.21**	0.07	0.18*	0.16*	0.15	0.21**	0.14	160	160	160	160	151	151	155	155	155	155	158	158	160	160	158	158	151	158	158	160	160	160
Visual Difference Decision Nouns Move	0.04	0.04	0.01	0.1	0.08	0.14	0.01	0.1	0.02	-0.04	0	-0.02	-0.04	0.01	0	0.1	0.18*	0.11	0.15	0.11	0.06	0.16*	0.11	0.17*	160	160	160	151	151	155	155	155	155	158	158	160	160	158	158	151	158	158	160	160	160
Visual Feature Recall Nouns Stationary	0.17*	0.22**	0.12	0.06	0.13	0.12	0.09	0.20*	0.12	0.05	0.06	0.19*	0.14	0.21**	0.18*	0.27**	0.25**	0.15	0.23**	0.32**	0.20*	0.23**	0.25**	0.31**	0.16*	160	160	151	151	155	155	155	155	158	158	160	160	158	158	151	158	158	160	160	160
Visual Feature Recall Nouns Move	0.12	0.20*	0.07	0.09	0.12	0.08	0	0.18*	0.15	0.05	0.07	0.13	0.15	0.19*	0.13	0.28**	0.26**	0.16*	0.17*	0.29**	0.16	0.13	0.30**	0.29**	0.15	0.47**	160	151	151	155	155	155	155	158	158	160	160	158	158	151	158	158	160	160	160
Visual Difference Decision Verbs	0.1	0.03	0.06	0.01	0.01	0.11	-0.07	0.06	0.01	0.06	0.02	0.04	0.03	0.15	0.07	0.13	0.15	0.08	0.15	0.18*	0.16	0.32**	0.26**	0.08	0.09	0.25**	0.26**	155	155	149	149	149	149	152	152	151	151	152	152	155	152	152	155	155	155
Visual Feature Recall Verbs	0.01	0.1	0.02	0.1	0.14	0.27**	0.1	0.17*	0.05	0.15	0.09	0.13	0.07	0.07	-0.01	0.04	0.23**	0.19*	0.21**	0.12	0.08	0.12	0.22**	0.05	0.1	0.1	0.15	0.08	155	149	149	149	149	152	152	151	151	152	152	155	152	152	155	155	155
Visual Difference Decision Nouns Visually Similar	0.28**	0.13	0.23**	0.08	0.02	0.02	-0.04	0.11	0.23**	0.03	0.11	0.09	0.15	0.31**	0.25**	0.26**	0.04	-0.03	0.05	0.08	0.08	0.1	0.21*	0.25**	0.13	0.17*	0.28**	0.04	-0.14	159	159	159	159	156	156	155	155	156	156	149	156	156	159	159	159
Visual Difference Decision Nouns Visually Dissimilar	0.16	0.27**	0.23**	-0.06	0.12	0.1	0.04	0.15	0.16*	0.02	0.1	0.07	0.08	0.28**	0.25**	0.22**	0.09	0.24**	0.26**	0.28**	0.11	0.22**	0.16	0.30**	0.18*	0.33**	0.38**	0.04	0.12	0.38**	159	159	159	156	156	155	155	156	156	149	156	156	159	159	159
Phonological-Visual Linking Nouns 2 Syllable	0.26**	0.41**	0.20*	0.20*	0.20*	0.13	0.1	0.20*	0.32**	0.33**	0.14	0.14	0.28**	0.33**	0.32**	0.47**	0.32**	0.16*	0.17*	0.33**	0.33**	0.33**	0.35**	0.24**	0.09	0.31**	0.32**	-0.01	0.01	0.28**	0.27**	159	159	156	156	155	155	156	156	149	156	156	159	159	159
Phonological-Visual Linking Nouns 4 Syllable	0.19*	0.38**	0.09	0.13	0.25**	0.12	0.16*	0.25**	0.28**	0.31**	0.11	0.14	0.32**	0.39**	0.32**	0.49**	0.17*	0.11	0.18*	0.38**	0.40**	0.20*	0.25**	0.22**	0.04	0.29**	0.33**	0.02	0	0.27**	0.33**	0.78**	159	156	156	155	155	156	156	149	156	156	159	159	159
Phonological-Visual Linking Nouns Similar	0.06	0.30**	0.09	0.16*	0.20*	0.22**	0.13	0.21**	0.39**	0.34**	0.19*	0.28**	0.29**	0.19*	0.03	0.36**	0.27**	0.27**	0.29**	0.49**	0.50**	0.25**	0.20*	0.17*	0.1	0.23**	0.19*	0.13	-0.03	0.12	0.13	0.46**	0.41**	162	162	158	158	159	159	152	159	159	162	162	162
Phonological-Visual Linking Nouns Dissimilar	0.01	0.18*	0.06	0.11	0.22**	0.11	0.06	0.18*	0.29**	0.29**	0.12	0.23**	0.24**	0.21**	0.05	0.39**	0.21**	0.24**	0.31**	0.40**	0.47**	0.24**	0.21*	0.14	0.11	0.20**	0.14	0.07	-0.06	0.14	0.15	0.46**	0.43**	0.83**	162	158	158	159	159	152	159	159	162	162	162
Phonological-Visual Linking Verbs Stationary	0.17*	0.36**	0.11	0.15	0.27**	0.23**	0.02	0.22**	0.24**	0.31**	0.13	0.13	0.32**	0.27**	0.21*	0.43**	0.18*	0.14	0.13	0.28**	0.37**	0.27**	0.30**	0.23**	0.20*	0.37**	0.27**	0.21*	-0.08	0.18*	0.08	0.43**	0.40**	0.47**	0.42**	160	160	158	158	151	158	158	160	160	160
Phonological-Visual Linking Verbs Move	0.16	0.39**	0.16*	0.14	0.27**	0.15	0.13	0.25**	0.25**	0.30**	0.17*	0.18*	0.28**	0.20*	0.12	0.47**	0.36**	0.18*	0.23**	0.34**	0.39**	0.34**	0.39**	0.28**	0.12	0.42**	0.35**	0.21**	0.01	0.13	0.13	0.45**	0.39**	0.49**	0.40**	0.80**	160	158	158	151	158	158	160	160	160
Phonological-Visual Linking Nouns Visually Similar	0.24**	0.37**	0.1	0.11	0.20*	0.20*	0.20*	0.27**	0.36**	0.35**	0.20*	0.24**	0.26**	0.32**	0.15	0.46**	0.16*	0.23**	0.14	0.35**	0.36**	0.35**	0.35**	0.17*	0.1	0.29**	0.28**	0.18*	0.07	0.15	0.13	0.48**	0.48**	0.51**	0.45**	0.50**	0.50**	162	162	152	162	162	162	162	162
Phonological-Visual Linking Nouns Visually Dissimilar	0.25**	0.32**	0.05	0.13	0.14	0.15	0.16*	0.20*	0.26**	0.33**	0.12	0.19*	0.27**	0.28**	0.11	0.38**	0.13	0.16*	0.13	0.27**	0.34**	0.28**	0.23**	0.14	0.16	0.24**	0.25**	0.11	0.03	0.17*	0.16	0.44**	0.43**	0.47**	0.43**	0.44**	0.45**	0.81**	162	152	162	162	162	162	162
Phonological-Visual Linking Verbs	0.14	0.37**	0.11	0.09	0.14	0.20*	0.12	0.27**	0.35**	0.26**	0.26**	0.11	0.24**	0.23**	0.02	0.42**	0.24**	0.15	0.23**	0.44**	0.39**	0.43**	0.42**	0.21**	0.09	0.25**	0.24**	0.24**	0.06	0.11	0.06	0.45**	0.41**	0.55**	0.51**	0.53**	0.55**	0.54**	0.47**	155	152	152	155	155	155
Visual Feature Recall Nouns Visually Similar	0.04	0.11	0.02	0.08	0.16*	0.06	0.08	0.07	0.07	0.07	0.11	-0.05	0.05	0.12	0.15	0.25**	0.15	0.12	0.24**	0.29**	0.15	0.18*	0.27**	0.05	0.01	0.38**	0.38**	0.20*	0.12	0.04	0.28**	0.29**	0.29**	0.14	0.13	0.22**	0.27**	0.24**	0.13	0.20*	162	162	162	162	162
Visual Feature Recall Nouns Visually Dissimilar	0.09	0.21**	0.09	0.1	0.14	0.16*	0.06	0.17*	0.13	0.15	0.02	0.09	0.19*	0.27**	0.23**	0.31**	0.25**	0.1	0.16*	0.30**	0.21**	0.29**	0.29**	0.12	0.17*	0.45**	0.40**	0.28**	0.1	0.12	0.34**	0.43**	0.36**	0.23**	0.18*	0.28**	0.33**	0.38**	0.34**	0.32**	0.43**	162	162	162	162
EVT-2	0.15	0.19*	0.09	0.13	0.15	0.30**	-0.03	0.04	0.22**	0.13	0.12	0.07	0.18*	0.18*	0.04	0.1	0.11	0.15	0.16*	0.26**	0.15	0.05	0.23**	0.26**	0.11	0.18*	0.19*	0.07	0.09	0.14	0.21**	0.14	0.05	0.25**	0.19*	0.22**	0.20*	0.19*	0.16*	0.05	0.21**	0.16*	167	167	167
KABC-2	0.15	0.34**	0.21**	0.11	0.23**	0.09	0.37**	0.37**	0.39**	0.26**	0.11	0.32**	0.42**	0.22**	0.08	0.25**	0.16	0.05	0.19*	0.15	0.08	0.15	0.25**	0.17*	0.14	0.26**	0.24**	0.21**	0.16*	0.14	0.24**	0.16*	0.16*	0.27**	0.21**	0.29**	0.31**	0.32**	0.24**	0.22**	0.21**	0.22**	0.29**	167	167
KABC_scaled	0.15	0.34**	0.21**	0.11	0.23**	0.09	0.37**	0.37**	0.39**	0.26**	0.11	0.32**	0.42**	0.22**	0.08	0.25**	0.16	0.05	0.19*	0.15	0.08	0.15	0.25**	0.17*	0.14	0.26**	0.24**	0.21**	0.16*	0.14	0.24**	0.16*	0.16*	0.27**	0.21**	0.29**	0.31**	0.32**	0.24**	0.22**	0.21**	0.22**	0.29**	1.00NA	167
Mean	0.83	0.75	0.86	19.58	1.81	11.54	10.77	1.33	6.88	0.85	12.25	4.4	4.32	0.54	0.44	0.37	0.19	0.34	0.31	0.29	0.28	0.39	0.2	0.6	0.63	0.69	0.68	0.52	0.43	0.69	0.67	0.67	0.71	0.6	0.62	0.63	0.63	0.61	0.64	0.54	0.7	0.66	112.39	117.6	11.76
SD	0.14	0.19	0.28	6.84	1.3	6.58	6.11	0.67	5.76	0.69	6.88	3.3	2.67	0.34	0.35	0.19	0.12	0.34	0.34	0.18	0.17	0.31	0.12	0.32	0.28	0.16	0.18	0.26	0.14	0.32	0.3	0.17	0.15	0.2	0.19	0.18	0.19	0.19	0.19	0.18	0.18	0.16	10.95	15.53	1.55
The correlations are computed using pairwise deletion. The results in the paper were not based on the statistics reported in the table, but were
computed based on raw data and maximum likelihood estimation with robust standard errors (MLR). *p < .05. **p < .01.
KABC_scaled = KABC-2 scores divided by 10, to rescale variance for successful execution of the structural equation models
