# Supplementary material
Source: publisher figshare collection journal article supplement (https://asha.figshare.com/articles/dataset/_/19125911)
Supplement: Supplementary file 2 [file 1]

**Supplemental Material S3.** Estimated factor loadings and error variances for the word learning variables for the phonological factor from the model.

| Variable                                              | Phonological Word Learning |                 |                |                        | Error Variance   |                 |                        |
|-------------------------------------------------------|----------------------------|-----------------|----------------|------------------------|------------------|-----------------|------------------------|
|                                                       | Est <sup>a</sup>           | SE <sup>b</sup> | p <sup>c</sup> | Std. Est. <sup>d</sup> | Est <sup>a</sup> | SE <sup>b</sup> | Std. Est. <sup>d</sup> |
| Mispronunciation Detection Verbs                      | 1.15                       | 0.19            | .000           | .48                    | 0.07             | 0.01            | .76                    |
| Phonological-Visual Linking Nouns 2 Syllables         | 0.88                       | 0.13            | .000           | .68                    | 0.02             | 0.00            | .54                    |
| Phonological-Visual Linking Nouns 4 Syllables         | 0.73                       | 0.12            | .000           | .63                    | 0.01             | 0.00            | .60                    |
| Phonological-Visual Linking Nouns Similar             | 1.06                       | 0.11            | .000           | .69                    | 0.02             | 0.00            | .53                    |
| Phonological-Visual Linking Nouns Dissimilar          | 0.91                       | 0.11            | .000           | .63                    | 0.02             | 0.00            | .61                    |
| Phonological-Visual Linking Verbs Stationary          | 0.91                       | 0.11            | .000           | .65                    | 0.02             | 0.00            | .58                    |
| Phonological-Visual Linking Verbs Move                | 1.03                       | 0.11            | .000           | .70                    | 0.02             | 0.00            | .51                    |
| Phonological-Visual Linking Nouns Visually Similar    | 1.03                       | 0.11            | .000           | .70                    | 0.02             | 0.00            | .50                    |
| Phonological-Visual Linking Nouns Visually Dissimilar | 0.90                       | 0.12            | .000           | .61                    | 0.02             | 0.00            | .63                    |
| Naming Nouns 2 Syllables                              | 0.92                       | 0.12            | .000           | .63                    | 0.02             | 0.00            | .61                    |
| Naming Nouns 4 Syllables                              | 0.36                       | 0.08            | .000           | .40                    | 0.01             | 0.00            | .84                    |
| Naming Nouns Similar                                  | 0.86                       | 0.12            | .000           | .62                    | 0.02             | 0.00            | .62                    |
| Naming Nouns Dissimilar                               | 0.79                       | 0.12            | .000           | .58                    | 0.02             | 0.00            | .66                    |
| Naming Verbs                                          | 0.48                       | 0.08            | .000           | .53                    | 0.01             | 0.00            | .72                    |
| Mispronunciation Detection Nouns 2 Syllables          | 1.12                       | 0.27            | .000           | .42                    | 0.09             | 0.01            | .82                    |
| Mispronunciation Detection Nouns 4 Syllables          | 0.65                       | 0.25            | .011           | .24                    | 0.11             | 0.01            | .94                    |
| Mispronunciation Detection Nouns Similar              | 0.79                       | 0.22            | .000           | .30                    | 0.10             | 0.01            | .91                    |
| Mispronunciation Detection Nouns Dissimilar           | 1.02                       | 0.23            | .000           | .38                    | 0.10             | 0.01            | .86                    |
| Phonological-Visual Linking Verbs                     | 1.00+                      |                 |                | .72                    | 0.02             | 0.00            | .48                    |

*Note.* + indicates the parameter was fixed to identify the model. <sup>a</sup>Est = Unstandardized estimate; <sup>b</sup>SE = Standard error; <sup>c</sup>p-value, an entry of 0 indicates the value was < .001; <sup>d</sup>Std. Est. = Standardized estimate.
