# Supplementary material
Source: publisher figshare collection journal article supplement (https://asha.figshare.com/articles/dataset/_/19125911)
Supplement: Supplementary file 3 [file 1]

**Supplemental Material S5.** Estimated error covariances for word learning variables from the model.

| <b>Pairing of Variables</b>                                                                                | <b>Est<sup>a</sup></b> | <b>SE<sup>b</sup></b> | <b><i>p</i><sup>c</sup></b> | <b>Std. Est.<sup>d</sup></b> |
|------------------------------------------------------------------------------------------------------------|------------------------|-----------------------|-----------------------------|------------------------------|
| Mispronunciation Detection Nouns 2 Syllables w/Mispronunciation Detection Nouns 4 Syllables                | 0.03                   | 0.01                  | .000                        | .33                          |
| Naming Nouns 2 Syllables w/Naming Nouns 4 Syllables                                                        | 0.00                   | 0.00                  | .054                        | .20                          |
| Mispronunciation Detection Nouns Similar w/Mispronunciation Detection Nouns Dissimilar                     | 0.02                   | 0.01                  | .049                        | .17                          |
| Naming Nouns Similar w/Naming Nouns Dissimilar                                                             | 0.01                   | 0.00                  | .000                        | .42                          |
| Visual Difference Decision Nouns Stationary w/Visual Difference Decision Nouns Move                        | 0.01                   | 0.01                  | .376                        | .08                          |
| Visual Difference Nouns Visually Dissimilar w/Visual Difference Nouns Visually Similar                     | 0.02                   | 0.01                  | .119                        | .28                          |
| Phonological-Visual Linking Nouns 2 Syllables w/Phonological-Visual Linking Nouns 4 Syllables              | 0.01                   | 0.00                  | .000                        | .61                          |
| Phonological-Visual Linking Nouns Similar w/Phonological-Visual Linking Nouns Dissimilar                   | 0.01                   | 0.00                  | .000                        | .71                          |
| Phonological-Visual Linking Verbs Stationary w/Phonological-Visual Linking Verbs Move                      | 0.01                   | 0.00                  | .000                        | .63                          |
| Phonological-Visual Linking Nouns Visually Similar w/Phonological-Visual Linking Nouns Visually Dissimilar | 0.01                   | 0.00                  | .000                        | .68                          |
| Visual Feature Recall Nouns Stationary w/Visual Feature Recall Nouns Move                                  | 0.00                   | 0.00                  | .688                        | .04                          |
| Visual Feature Recall Nouns Visually Similar w/Visual Feature Recall Nouns Visually Dissimilar             | 0.00                   | 0.00                  | .110                        | .17                          |

*Note.* <sup>a</sup>Est = Unstandardized estimate; <sup>b</sup>SE = Standard error; <sup>c</sup>*p*-value, an entry of 0 indicates the value was < .001; <sup>d</sup>Std. Est. = Standardized estimate which is a correlation.
