# Supplementary material
Source: publisher figshare collection journal article supplement (https://asha.figshare.com/articles/dataset/_/19125911)
Supplement: Supplementary file 4 [file 1]

**Supplemental Material S4.** Estimated factor loadings and error variances for the word learning variables for the semantic factor from the model.

| Variable                                        | Semantic Word Learning |                 |                |                        | Error Variance   |                 |                        |
|-------------------------------------------------|------------------------|-----------------|----------------|------------------------|------------------|-----------------|------------------------|
|                                                 | Est <sup>a</sup>       | SE <sup>b</sup> | p <sup>c</sup> | Std. Est. <sup>d</sup> | Est <sup>a</sup> | SE <sup>b</sup> | Std. Est. <sup>d</sup> |
| Visual Difference Nouns Visually Dissimilar     | 1.38                   | 0.29            | .000           | .51                    | 0.07             | 0.01            | .74                    |
| Visual Difference Decision Nouns Stationary     | 1.15                   | 0.35            | .001           | .40                    | 0.08             | 0.01            | .84                    |
| Visual Difference Decision Nouns Move           | 0.64                   | 0.24            | .008           | .25                    | 0.07             | 0.01            | .94                    |
| Visual Difference Decision Verbs                | 0.85                   | 0.20            | .000           | .37                    | 0.06             | 0.01            | .87                    |
| Visual Feature Recall Verbs                     | 0.22                   | 0.11            | .048           | .17                    | 0.02             | 0.00            | .97                    |
| Visual Difference Nouns Visually Similar        | 0.85                   | 0.35            | .016           | .29                    | 0.09             | 0.02            | .91                    |
| Visual Feature Recall Nouns Stationary          | 1.00+                  |                 |                | .67                    | 0.01             | 0.00            | .54                    |
| Visual Feature Recall Nouns Move                | 1.04                   | 0.13            | .000           | .66                    | 0.02             | 0.00            | .56                    |
| Visual Feature Recall Nouns Visually Similar    | 0.81                   | 0.16            | .000           | .51                    | 0.02             | 0.00            | .74                    |
| Visual Feature Recall Nouns Visually Dissimilar | 0.90                   | 0.13            | .000           | .63                    | 0.02             | 0.00            | .61                    |

*Note.* + indicates the parameter was fixed to identify the model. <sup>a</sup>Est = Unstandardized estimate; <sup>b</sup>SE = Standard error; <sup>c</sup>p-value, an entry of 0 indicates the value was < .001; <sup>d</sup>Std. Est. = Standardized estimate.
