# Supplementary material
Source: publisher figshare collection journal article supplement (https://asha.figshare.com/articles/dataset/_/19125911)
Supplement: Supplementary file 5 [file 1]

**Supplemental Material S8.** Estimated covariances of the latent disturbances for the word learning factors from the model.

|                            | <b>Semantic Word Learning</b>   | <b>Phonological Word Learning</b> |
|----------------------------|---------------------------------|-----------------------------------|
| Semantic Word Learning     | .01 (<.01)<br>.52               |                                   |
| Phonological Word Learning | .01 (<.01)<br>.57<br>$p < .001$ | .01 (<.01)<br>.81                 |

*Note.* Estimates are given, followed by standard errors in parentheses, with standardized values below.  $p$  values are given for the tests of the covariances.
