# Supplementary material
Source: publisher figshare collection journal article supplement (https://asha.figshare.com/articles/dataset/_/19125911)
Supplement: Supplementary file 6 [file 1]

**Supplemental Material S7.** Estimated structural coefficients for predicting the phonological and semantic word learning factors from the model.

| Variable                                           | Phonological Word Learning |                 |                |                        | Semantic Word Learning |                 |                |                        |
|----------------------------------------------------|----------------------------|-----------------|----------------|------------------------|------------------------|-----------------|----------------|------------------------|
|                                                    | Est <sup>a</sup>           | SE <sup>b</sup> | p <sup>c</sup> | Std. Est. <sup>d</sup> | Est <sup>a</sup>       | SE <sup>b</sup> | p <sup>c</sup> | Std. Est. <sup>d</sup> |
| Central Executive                                  | 0.28                       | 0.11            | .013           | .37                    | 0.22                   | 0.13            | .077           | .35                    |
| Focus of Attention/Visuospatial Sketch Pad         | 0.05                       | 0.07            | .421           | .17                    | -0.06                  | 0.07            | .348           | -.22                   |
| Phonological Storage & Rehearsal/Phonological Loop | 0.01                       | 0.01            | .080           | .32                    | 0.00                   | 0.00            | .169           | .19                    |
| EVT <sup>e</sup>                                   | 0.00                       | 0.00            | .996           | .00                    | 0.00                   | 0.00            | .252           | .12                    |
| KABC <sup>f</sup>                                  | 0.01                       | 0.01            | .580           | .07                    | 0.03                   | 0.01            | .010           | .36                    |

*Note.* <sup>a</sup>Est = Unstandardized estimate; <sup>b</sup>SE = Standard error; <sup>c</sup>p-value, an entry of 0 indicates the value was < .001; <sup>d</sup>Std. Est. = Standardized estimate. <sup>e</sup>EVT = Latent factor for the EVT-2 variable. <sup>f</sup>KABC = Latent factor for the KABC-2 variable.
