# Supplementary material
Source: publisher figshare collection journal article supplement (https://asha.figshare.com/articles/dataset/_/19125911)
Supplement: Supplementary file 7 [file 1]

**Supplemental Material S2.** Estimated factor loadings and error variances of the working memory variables from the model.

| Variable               | Central Executive |                 |                |                           | Focus of Attention/<br>Visuospatial Sketch Pad |                 |                |                           | Phonological Storage &<br>Rehearsal/<br>Phonological Loop |                 |                |                           | Error Variance   |                 |                           |
|------------------------|-------------------|-----------------|----------------|---------------------------|------------------------------------------------|-----------------|----------------|---------------------------|-----------------------------------------------------------|-----------------|----------------|---------------------------|------------------|-----------------|---------------------------|
|                        | Est <sup>a</sup>  | SE <sup>b</sup> | p <sup>c</sup> | Std.<br>Est. <sup>d</sup> | Est <sup>a</sup>                               | SE <sup>b</sup> | p <sup>c</sup> | Std.<br>Est. <sup>d</sup> | Est <sup>a</sup>                                          | SE <sup>b</sup> | p <sup>c</sup> | Std.<br>Est. <sup>d</sup> | Est <sup>a</sup> | SE <sup>b</sup> | Std.<br>Est. <sup>d</sup> |
| N-Back Auditory        | 0.39              | 0.07            | .000           | .46                       |                                                |                 |                |                           |                                                           |                 |                |                           | 0.02             | 0.00            | .79                       |
| N-Back Visual          | 1.00+             |                 |                | .89                       |                                                |                 |                |                           |                                                           |                 |                |                           | 0.01             | 0.00            | .22                       |
| Number Updating        | 0.66              | 0.18            | .000           | .41                       |                                                |                 |                |                           |                                                           |                 |                |                           | 0.06             | 0.01            | .84                       |
| Visual Span Running    |                   |                 |                |                           | 1.00+                                          |                 |                | .60                       |                                                           |                 |                |                           | 0.30             | 0.05            | .64                       |
| Location Span Running  |                   |                 |                |                           | 1.01                                           | 0.18            | .000           | .61                       |                                                           |                 |                |                           | 0.28             | 0.04            | .63                       |
| Visual Span            |                   |                 |                |                           | 8.82                                           | 1.77            | .000           | .63                       |                                                           |                 |                |                           | 20.00            | 2.97            | .61                       |
| Location Span          |                   |                 |                |                           | 8.42                                           | 1.97            | .000           | .56                       |                                                           |                 |                |                           | 25.43            | 3.73            | .68                       |
| Visual-Spatial Binding |                   |                 |                |                           | 4.83                                           | 0.83            | .000           | .59                       |                                                           |                 |                |                           | 7.09             | 1.06            | .65                       |
| Cross-Modal Binding    |                   |                 |                |                           | 3.44                                           | 0.7             | .000           | .53                       | 0.03                                                      | 0.07            | .631           | .06                       | 4.98             | 0.61            | .70                       |
| Digit Span Running     |                   |                 |                |                           | 0.96                                           | 0.29            | .001           | .30                       | 0.07                                                      | 0.04            | .077           | .23                       | 1.37             | 0.13            | .82                       |
| Phonological Binding   |                   |                 |                |                           | 1.48                                           | 1.51            | .324           | .09                       | 0.67                                                      | 0.23            | .003           | .44                       | 36.81            | 5.20            | .78                       |
| Digit Span             |                   |                 |                |                           |                                                |                 |                |                           | 0.63                                                      | 0.24            | .008           | .41                       | 38.67            | 6.08            | .83                       |
| Nonword Repetition     |                   |                 |                |                           |                                                |                 |                |                           | 1.00+                                                     |                 |                | .68                       | 23.02            | 6.54            | .54                       |

*Note.* + indicates the parameter was fixed to identify the model. <sup>a</sup>Est = Unstandardized estimate; <sup>b</sup>SE = Standard error; <sup>c</sup>p-value, an entry of 0 indicates the value was < .001; <sup>d</sup>Std. Est. = Standardized estimate.
